# Supplementary material for: A Keggin-based hybrid solid emerged as a promising candidate for CO2-mediated photocatalytic N-formylation of amines
Source: Royal Society of Chemistry journal article supplement (doi:10.1039/d4ta02432j), 2024-01-01
Supplement: d4ta02432j1.pdf [file d4ta02432j1.pdf]

## Supporting Information

# Keggin-Based Hybrid Solid Emerged as a Promising Candidate for CO<sub>2</sub>-Mediated Photocatalytic N-Formylation of Amines

Parul Sood,<sup>†a</sup> Sakshi Bhatt,<sup>†b,c</sup> Harshita Bagdwal,<sup>a</sup> Arti Joshi,<sup>d</sup> Ashi Singh,<sup>e</sup> Suman L. Jain<sup>b\*</sup> and Monika Singh<sup>a\*</sup>

<sup>a</sup>Institute of Nano Science and Technology, Sector-81, Knowledge City, Sahibzada Ajit Singh Nagar, Punjab, 140306, INDIA

<sup>b</sup>Synthetic Chemistry and Petrochemical Area, Chemical and Material Science Division, CSIR-Indian Institute of Petroleum, Dehradun-248005, India

<sup>c</sup>Academy of Scientific and Innovative Research, Ghaziabad-201002, India

<sup>d</sup>Department of Chemistry and the Ilse Katz Institute for Nanoscale Science & Technology, Ben-Gurion University of the Negev, Beer Sheva, 84105 Israel

<sup>e</sup>Department of Chemistry, Indian Institute of Technology, Delhi

\* corresponding authors: monika@inst.ac.in, suman@iip.res.in

---

## Table of Contents

1. Table S1. Crystal and structure refinement data for **PS-96** and **PS-97**.
2. Figure S1. Asymmetric unit of (a) **PS-96** and (b) **PS-97**.
3. Figure S2. Optical microscopic images of **PS-96**.
4. Figure S3. Optical microscopic images of **PS-97**.
5. Figure S4. FT-IR spectra of (a) **PS-96** and (b) **PS-97**.
6. Figure S5. FESEM images of **PS-96** (a-c) and **PS-97** (d-f).
7. Figure S6. TGA curves of **PS-96** and **PS-97**.
8. Figure S7. UV-DRS spectra of **PS-96** and **PS-97**.
9. Figure S8. Tauc plots of **PS-96** and **PS-97**.
10. Figure S9. PL spectrum of **PS-97**.
11. Figure S10. XPS survey spectra of **PS-96** and **PS-97**.
12. Table S2. Results of screening experiments of **PS-96** and **PS-97**.
13. Figure S11. Comparison of pre and post-CO<sub>2</sub> PXRD patterns of **PS-97**.
14. Figure S12. FTIR spectrum of Post-catalytic **PS-97**.
15. Figure S13. Post-catalytic FESEM images and mapping of **PS-97**.
16. Figure S14. GC spectrum of N-phenylformamide.
17. Figure S15. Mass spectrum of N-phenyl formamide.
18. Figure S16. GC spectrum of N-formyl morpholine.
19. Figure S17. Mass spectrum of N-formyl morpholine.
20. Figure S18. GC spectrum of N-p-tolylformamide.
21. Figure S19. Mass spectra of N-p-tolylformamide.
22. Figure S20. GC spectra of N-methyl-N-phenylformamide.
23. Figure S21. Mass Spectrum of N-methyl-N-phenylformamide.
24. Figure S22. GC spectrum of N-(4-methoxyphenyl)formamide.
25. Figure S23. Mass Spectrum of N-(4-methoxyphenyl)formamide.
26. Figure S24. GC spectrum of P-phenoxy formanilide.
27. Figure S25. Mass spectrum of P-phenoxy formanilide.
28. Figure S26. GC spectra of N-(4-chlorophenyl)formamide.
29. Figure S27. Mass spectra of N-(4-chlorophenyl)formamide.
30. Figure S28. <sup>1</sup>H NMR spectra of N- phenylformamide.
31. Figure S29. <sup>13</sup>C NMR spectra of N- phenylformamide.

32. Figure S30.  $^1\text{H}$  NMR spectra of N-p-tolylformamide.
33. Figure S31.  $^{13}\text{C}$  NMR spectrum of N-p-tolylformamide.
34. Figure S32.  $^1\text{H}$  NMR spectra of N-(4-methoxyphenyl)formamide.
35. Figure S33.  $^{13}\text{C}$ NMR spectra of N-(4-methoxyphenyl)formamide.
36. Figure S34.  $^1\text{H}$  NMR spectra of N-(4-chlorophenyl)formamide.
37. Figure S35.  $^{13}\text{C}$  NMR spectra of N-(4-chlorophenyl)formamide.
38. Figure S36.  $^1\text{H}$  NMR spectra of N-methyl-N-phenylformamide.
39. Figure S37.  $^{13}\text{C}$  NMR spectra of N-methyl-N-phenylformamide.
40. Figure S38.  $^1\text{H}$  NMR spectra of N-(4-nitrophenyl)formamide.
41. Figure S39.  $^{13}\text{C}$  NMR spectra of N-(4-nitrophenyl)formamide.
42. Figure S40.  $^1\text{H}$  NMR spectra of N-(2-bromophenyl)formamide.
43. Figure S41.  $^{13}\text{C}$  NMR spectra of N-(2-bromophenyl)formamide.

Table S1. Crystal and structure refinement data for PS-96 and PS-97.

| Parameter                               | (C <sub>5</sub> H <sub>7</sub> N <sub>2</sub> ) <sub>5</sub> [CoW <sub>12</sub> O <sub>40</sub> ] (PS-96) | (C <sub>5</sub> H <sub>7</sub> N <sub>2</sub> ) <sub>5</sub> [CuW <sub>12</sub> O <sub>40</sub> ] (PS-97) |
|-----------------------------------------|-----------------------------------------------------------------------------------------------------------|-----------------------------------------------------------------------------------------------------------|
| Formula                                 | C <sub>25</sub> H <sub>35</sub> CoW <sub>12</sub> N <sub>10</sub> O <sub>40</sub>                         | C <sub>25</sub> H <sub>35</sub> CuW <sub>12</sub> N <sub>10</sub> O <sub>40</sub>                         |
| Formula weight, g                       | 3375.60                                                                                                   | 3380.33                                                                                                   |
| T (K)                                   | 150.00(10)                                                                                                | 295                                                                                                       |
| Wavelength (Å)                          | 0.71073                                                                                                   | 0.71073                                                                                                   |
| Crystal system                          | Monoclinic                                                                                                | Monoclinic                                                                                                |
| Space Group                             | C 2/c                                                                                                     | C 2/c                                                                                                     |
| a (Å)                                   | 14.3244(4)                                                                                                | 14.3946(4)                                                                                                |
| b (Å)                                   | 21.9593(4)                                                                                                | 22.0069(6)                                                                                                |
| c (Å)                                   | 36.1645(8)                                                                                                | 36.3704(10)                                                                                               |
| α (°)                                   | 90                                                                                                        | 90                                                                                                        |
| β (°)                                   | 100.238(2)                                                                                                | 99.9820(10)                                                                                               |
| γ (°)                                   | 90                                                                                                        | 90                                                                                                        |
| V (Å <sup>3</sup> )                     | 11194.6(5)                                                                                                | 11347.0(5)                                                                                                |
| Z                                       | 8                                                                                                         | 8                                                                                                         |
| d <sub>calc</sub> (gcm <sup>-3</sup> )  | 4.006                                                                                                     | 3.957                                                                                                     |
| μ <sub>MoKα</sub> , (cm <sup>-1</sup> ) | 24.941                                                                                                    | 24.689                                                                                                    |
| R1(I>2σI)                               | 0.0981                                                                                                    | 0.0491                                                                                                    |
| WR2(all)                                | 0.2718                                                                                                    | 0.1398                                                                                                    |
| CCDC/CSD No.                            | 2258691                                                                                                   | 2271034                                                                                                   |

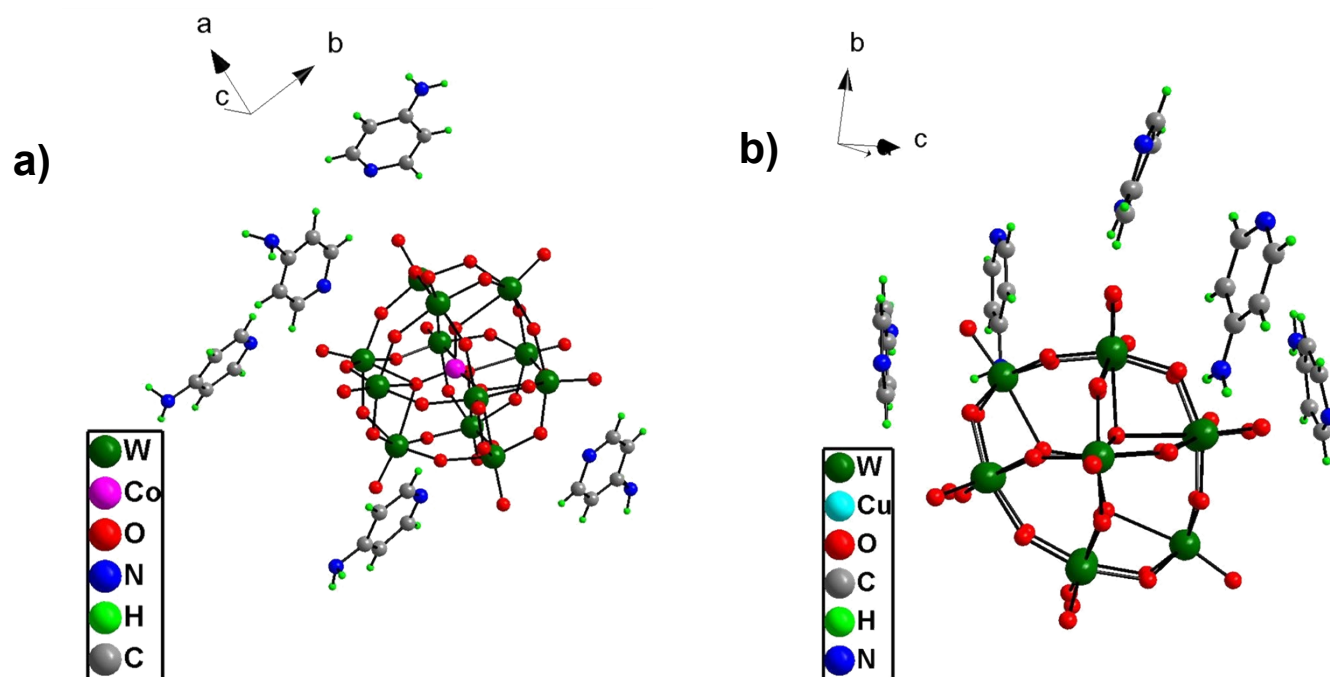

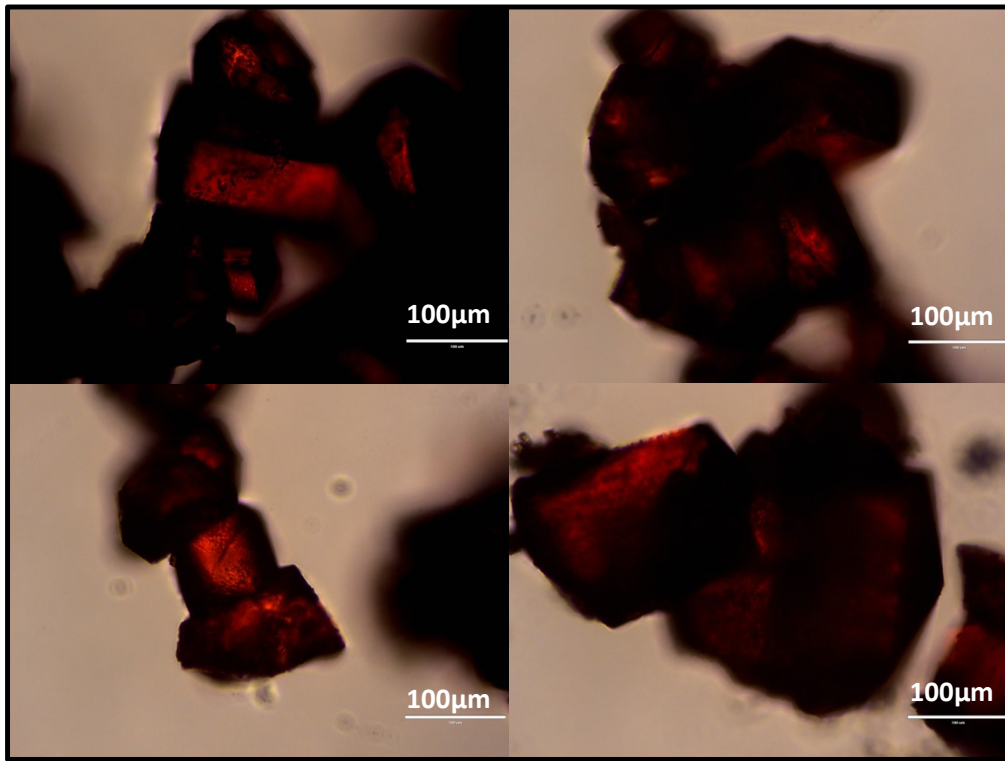

Figure S2. Optical microscopic images of PS-96.

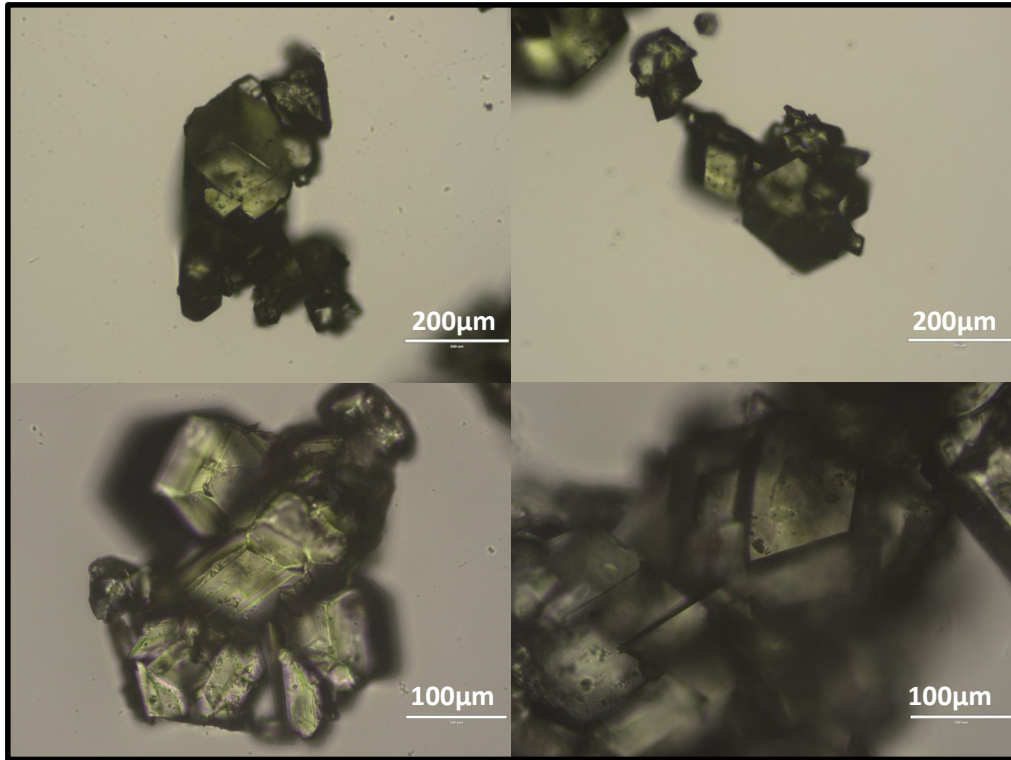

Figure S3. Optical microscopic images of PS-97.

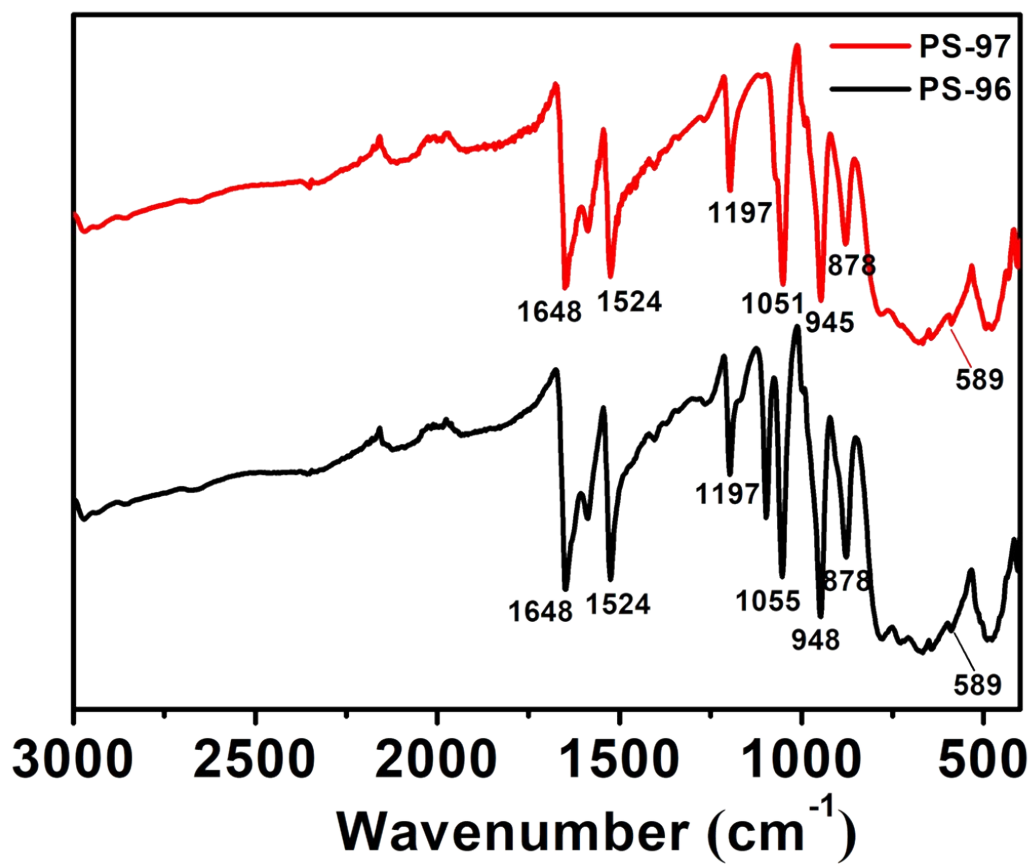

Figure S4. FT-IR spectra of PS-96 and PS-97.



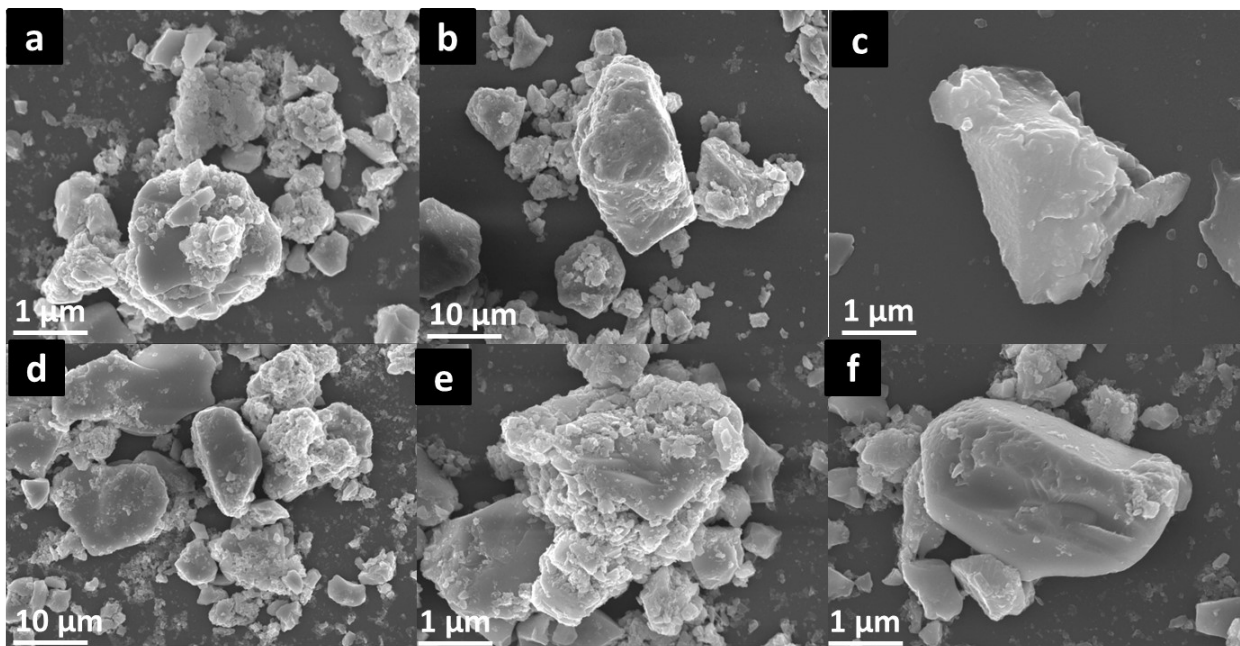

Figure S5. FESEM images of PS-96 (a-c) and PS-97 (d-f).

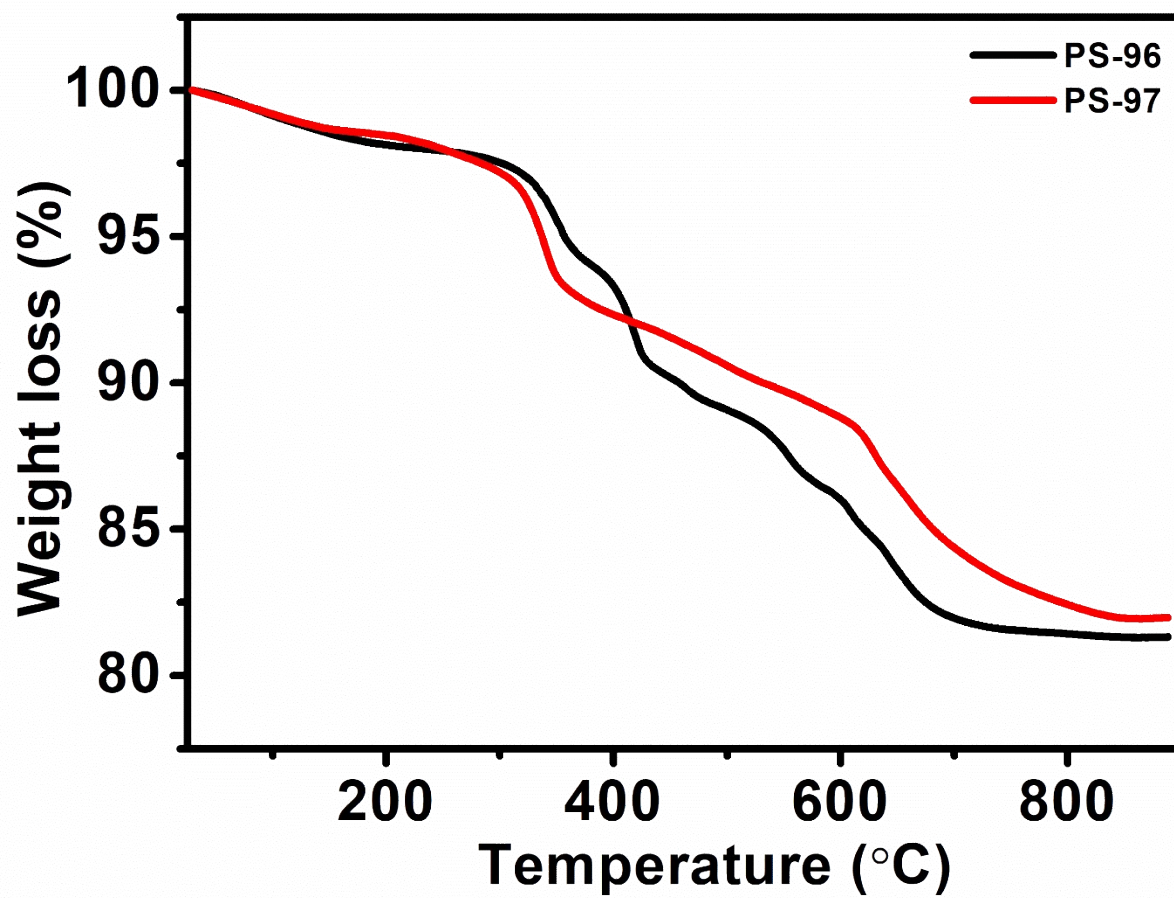

Figure S6. TGA curves of PS-96 and PS-97.

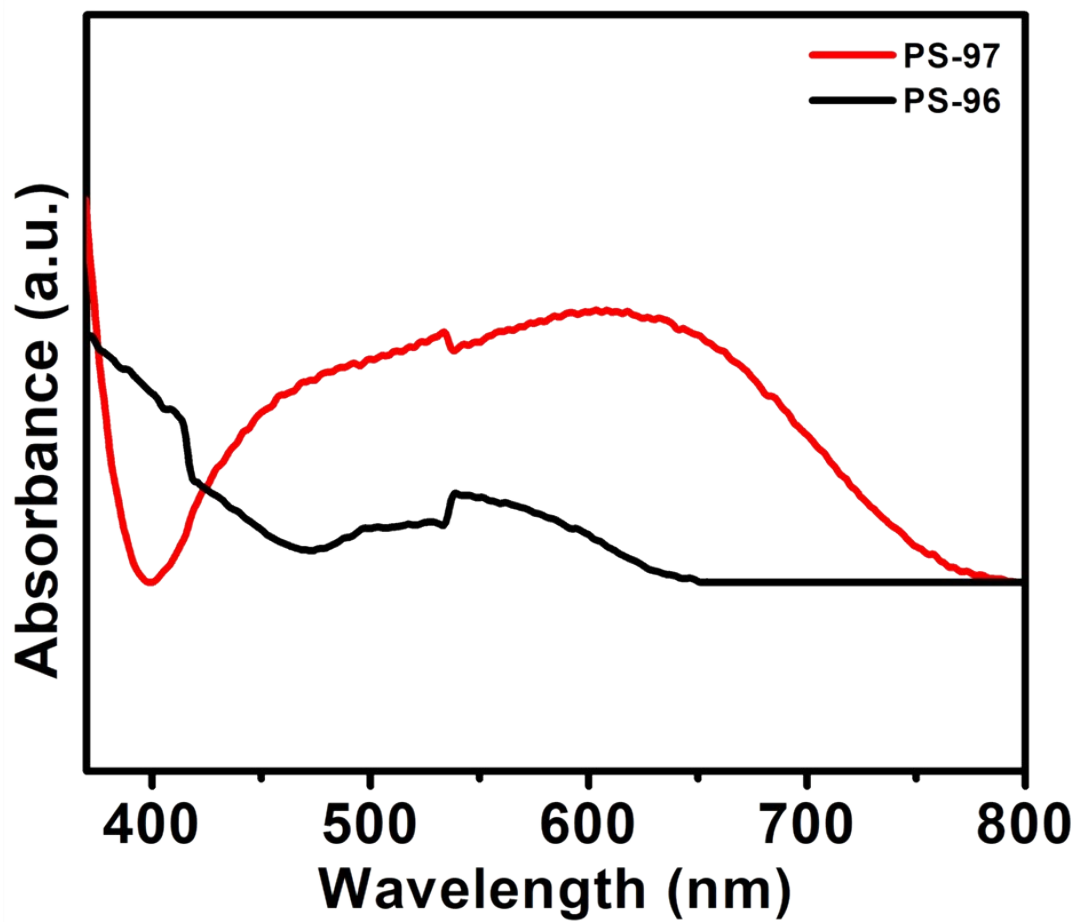

Figure S7. UV-DRS spectra of PS-96 and PS-97.

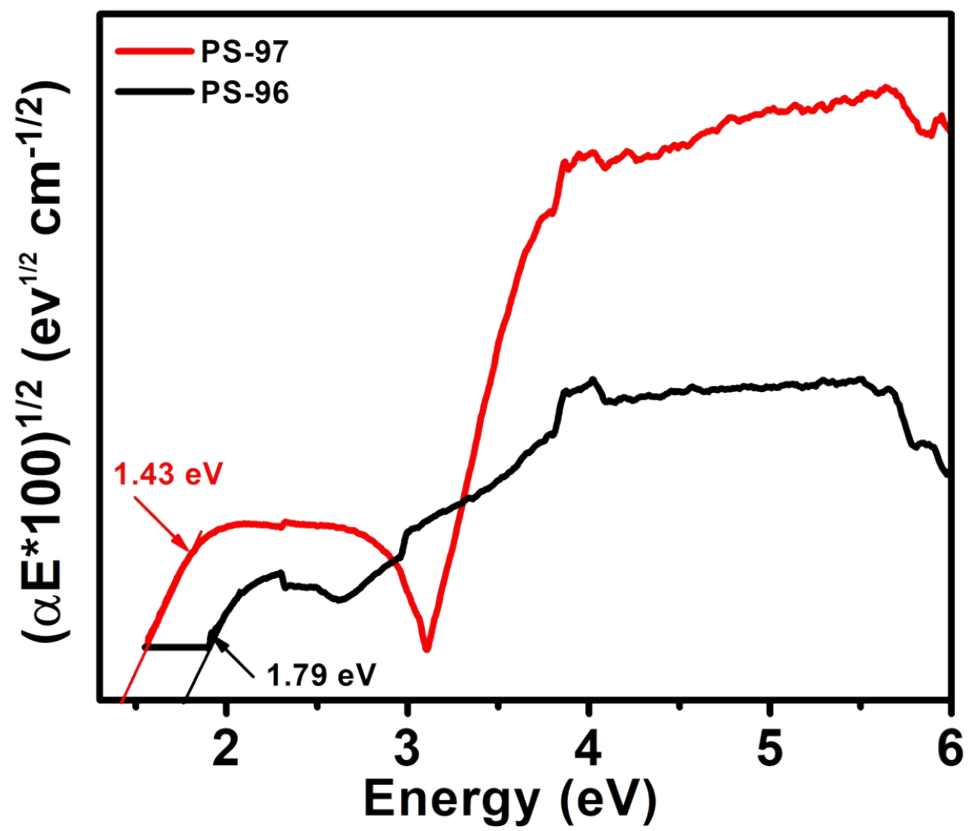

Figure S8. Tauc plots of PS-96 and PS-97.

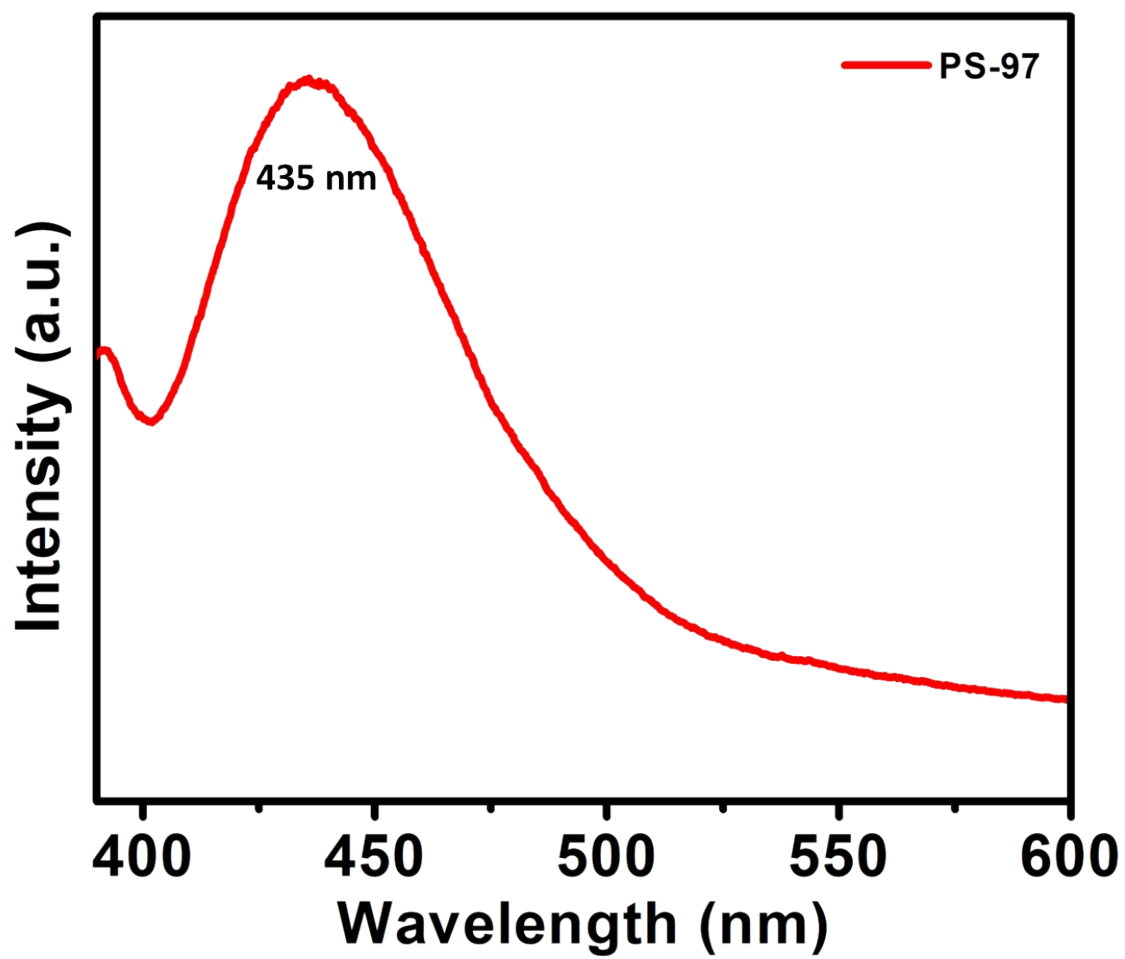

Figure S9. PL spectrum of PS-97.

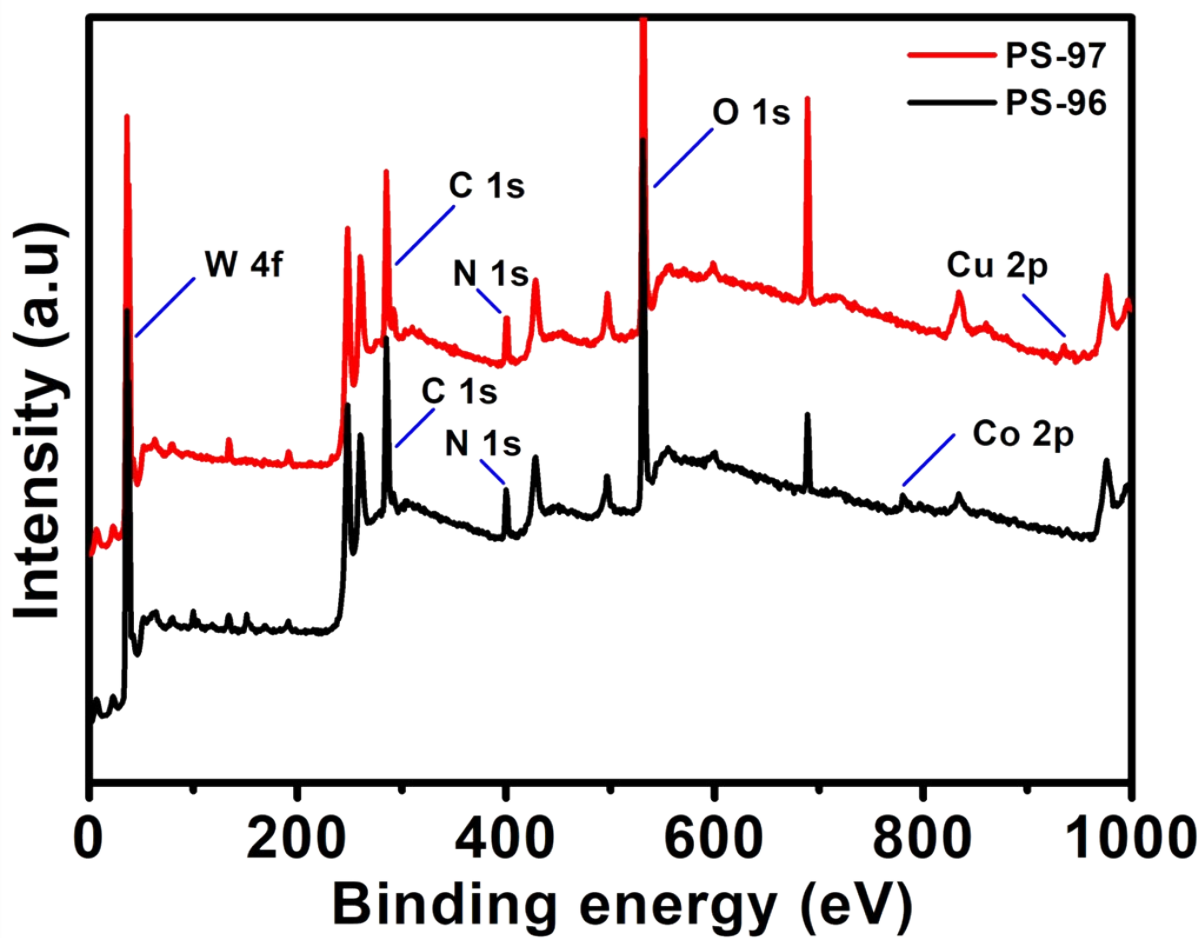

Figure S10. XPS survey spectra of PS-96 and PS-97.

**Table S2: The results of the Screening experiments<sup>a</sup>**

| S. No.            | Photocatalyst                                                                                                          | Irradiation | Solvent          | Reducing agent    | Reaction Time (h) | Conv <sup>b</sup> (%) | Yield <sup>b,c</sup> (%) |
|-------------------|------------------------------------------------------------------------------------------------------------------------|-------------|------------------|-------------------|-------------------|-----------------------|--------------------------|
| 1.                | Co-Keggin<br>(C <sub>5</sub> H <sub>7</sub> N <sub>2</sub> ) <sub>5</sub> [CoW <sub>12</sub> O <sub>40</sub> ] (PS-96) | yes         | DMF              | Phenyl silane     | 22                | 19                    | -                        |
| 2.                | Cu-Keggin<br>(C <sub>5</sub> H <sub>7</sub> N <sub>2</sub> ) <sub>5</sub> [CuW <sub>12</sub> O <sub>40</sub> ] (PS-97) | yes         | DMF              | Phenyl silane     | 22                | 81                    | 96                       |
| 3.                | Cu-Keggin                                                                                                              | -           | DMF              | Phenyl silane     | 22                | -                     | -                        |
| 4.                | -                                                                                                                      | yes         | DMF              | Phenyl silane     | 22                | -                     | -                        |
| 5.                | Cu-Keggin                                                                                                              | yes         | DMF              | Phenyl silane     | 12                | 32                    | 67                       |
| 6.                | Cu-Keggin                                                                                                              | yes         | DMF              | Phenyl silane     | 20                | 53                    | 78                       |
| 7.                | Cu-Keggin                                                                                                              | yes         | DMF              | Phenyl silane     | 24                | 82                    | 96                       |
| 8.                | Cu-Keggin                                                                                                              | yes         | DMA              | Phenyl silane     | 22                | 66                    | 74                       |
| 9.                | Cu-Keggin                                                                                                              | yes         | ACN              | Phenyl silane     | 22                | 54                    | 76                       |
| 10.               | Cu-Keggin                                                                                                              | yes         | DMSO             | Phenyl silane     | 22                | 52                    | 65                       |
| 11.               | Cu-Keggin                                                                                                              | yes         | CCl <sub>4</sub> | Phenyl silane     | 22                | 25                    | -                        |
| 12.               | Cu-Keggin                                                                                                              | yes         | Benzene          | Phenyl silane     | 22                | -                     | -                        |
| 13.               | Cu-Keggin                                                                                                              | yes         | Toluene          | Phenyl silane     | 22                | -                     | -                        |
| 14 <sup>d</sup> . | Cu-Keggin                                                                                                              | yes         | DMF              | Phenyl silane     | 22                | -                     | -                        |
| 15.               | Cu-Keggin                                                                                                              | yes         | DMF              | -                 | 22                | Trace                 | Trace                    |
| 16.               | Cu-Keggin                                                                                                              | yes         | DMF              | Dimethyl silane   | 22                | 42                    | 68                       |
| 17.               | Cu-Keggin                                                                                                              | yes         | DMF              | Diphenyl silane   | 22                | 28                    | 44                       |
| 18.               | Cu-Keggin                                                                                                              | yes         | DMF              | NaBH <sub>4</sub> | 22                | -                     | -                        |

Reaction conditions<sup>a</sup>: aniline (1mmol), PhSiH<sub>3</sub> (2mmol), Photocatalyst (50 mg), 1 atm CO<sub>2</sub> pressure, 25 °C temperature, and 20W white LED light irradiation, <sup>b,c</sup>conversion and product yield was demonstrated by GCMS and identity of the product was confirmed by NMR, <sup>d</sup>reaction without CO<sub>2</sub>.

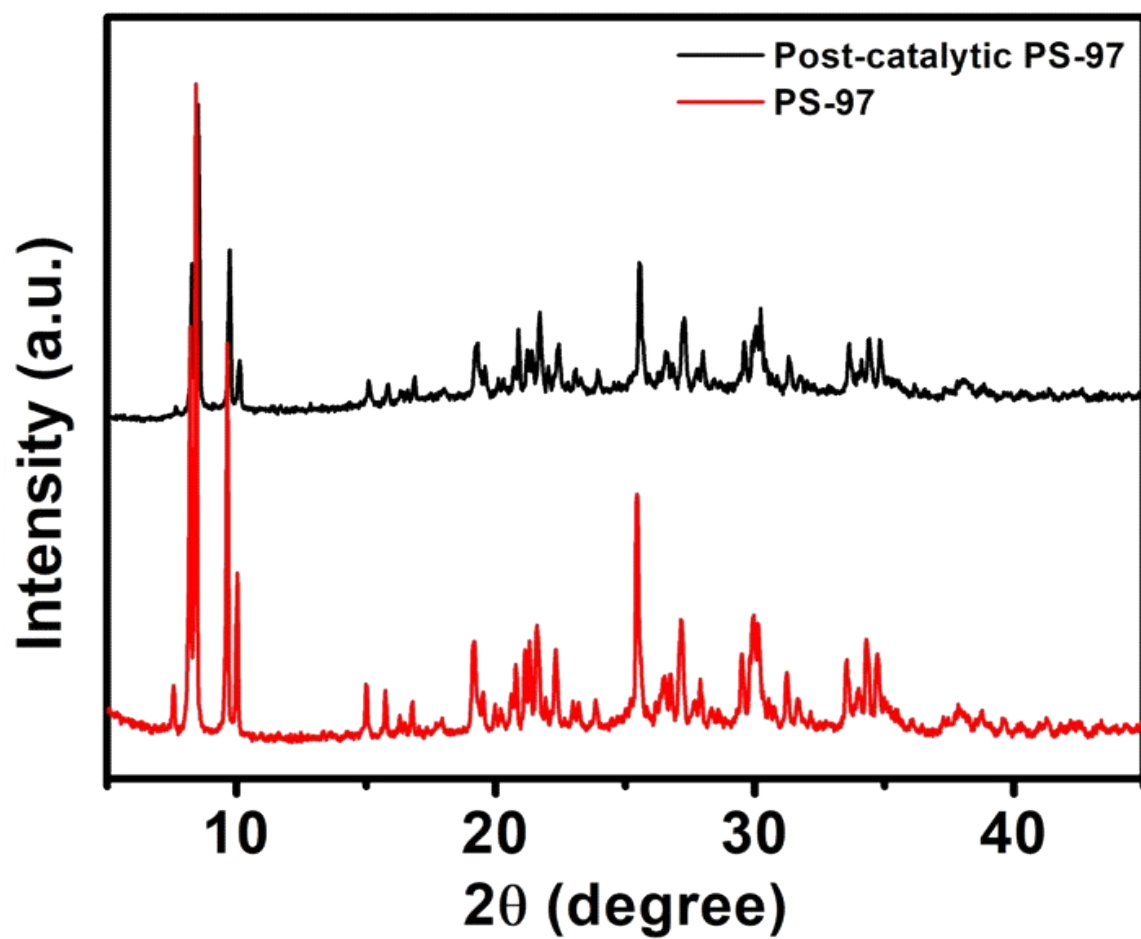

Figure S11. Comparison of pre and post-catalytic PXRD patterns of PS-97.



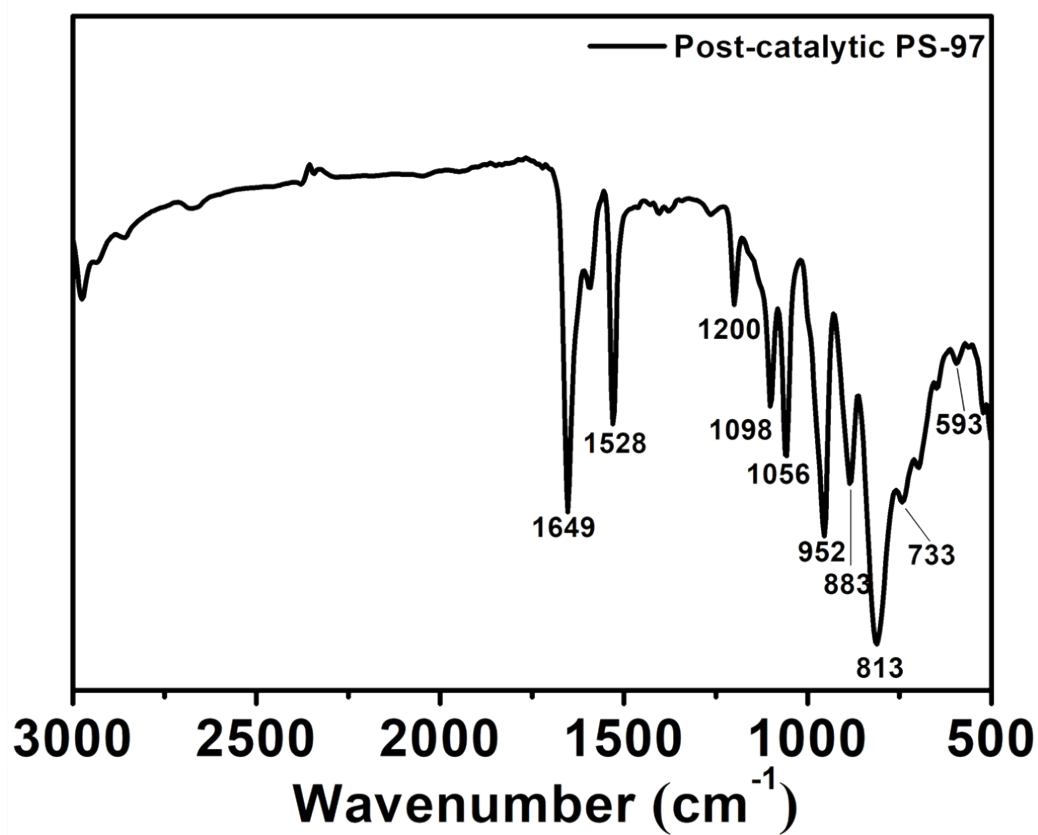

Figure S12. FT-IR spectrum of post-catalytic PS-97.

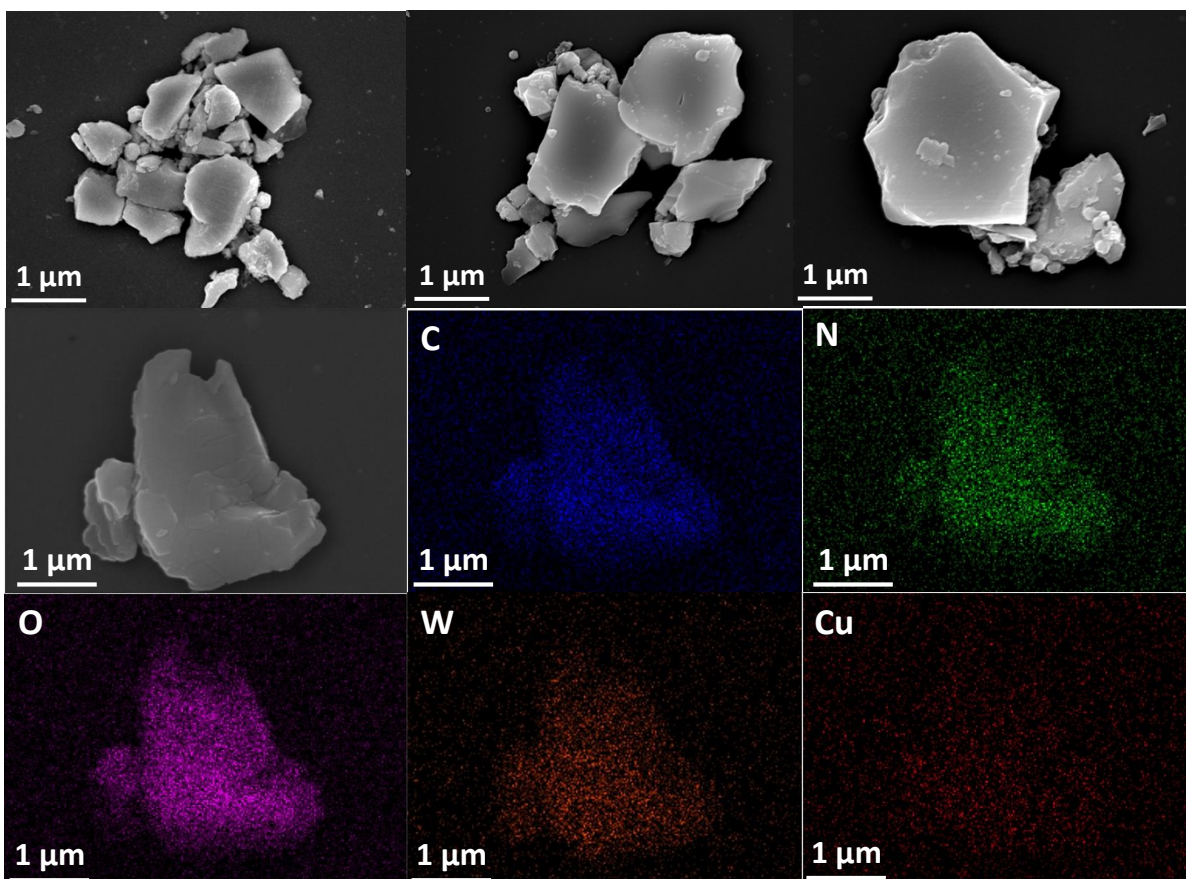

Figure S13. Post-catalytic FESEM images and mapping of PS-97.

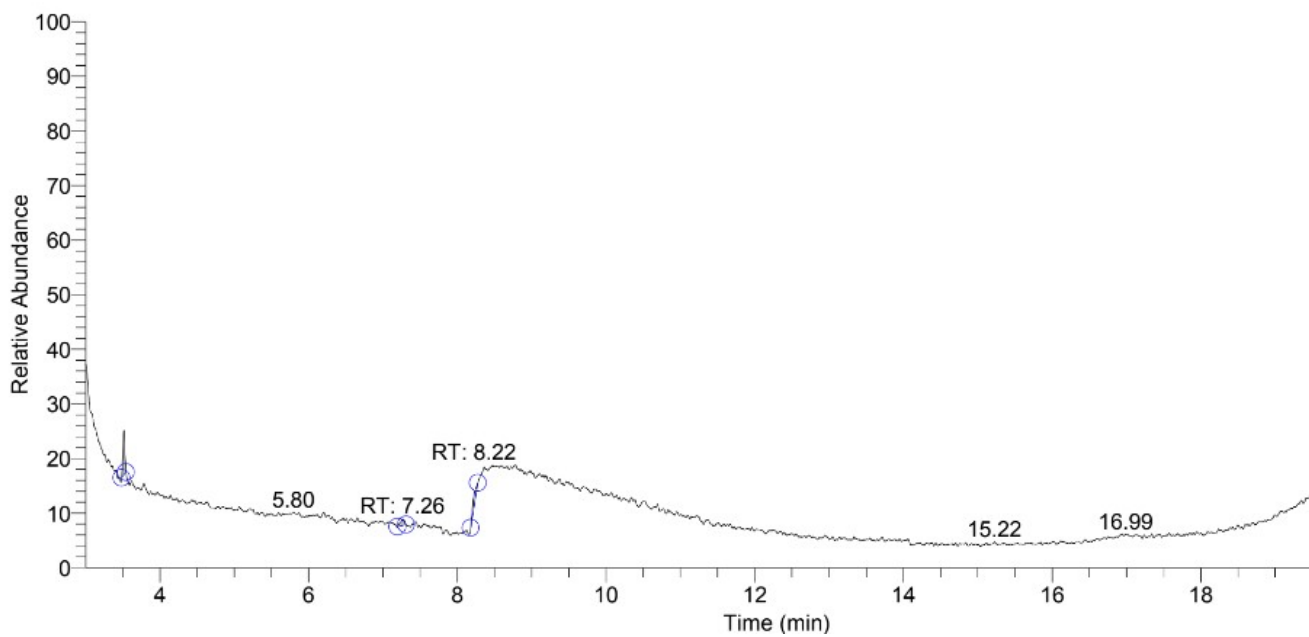

Figure S14. GC spectrum of N-phenylformamide.

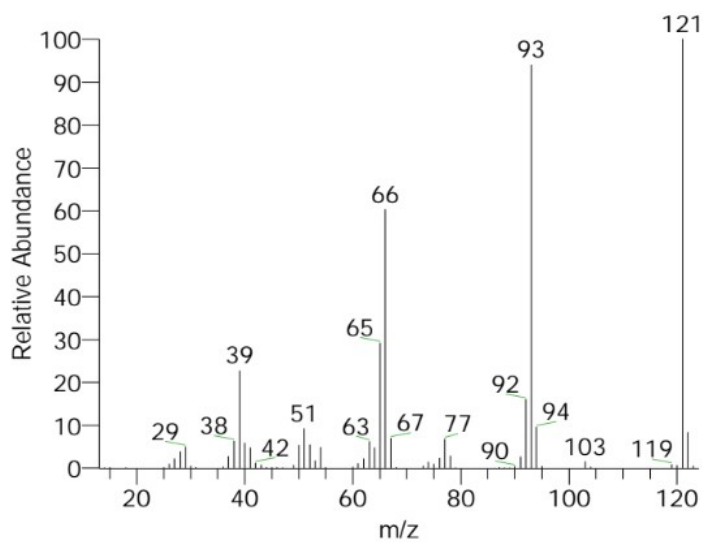

Figure S15. Mass spectrum of N-phenyl formamide.

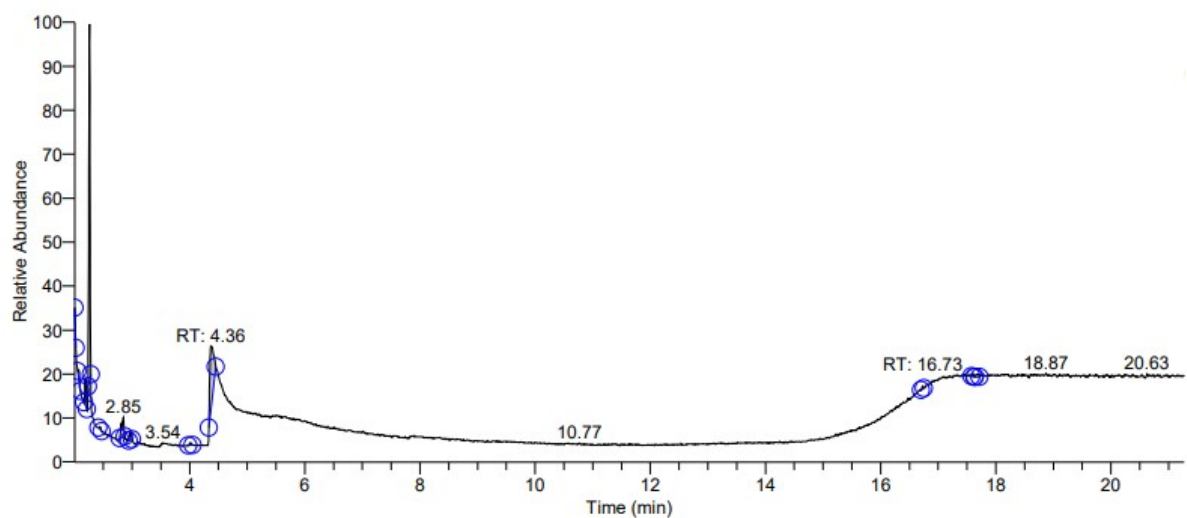

Figure S16. GC spectrum of N-formyl morpholine.

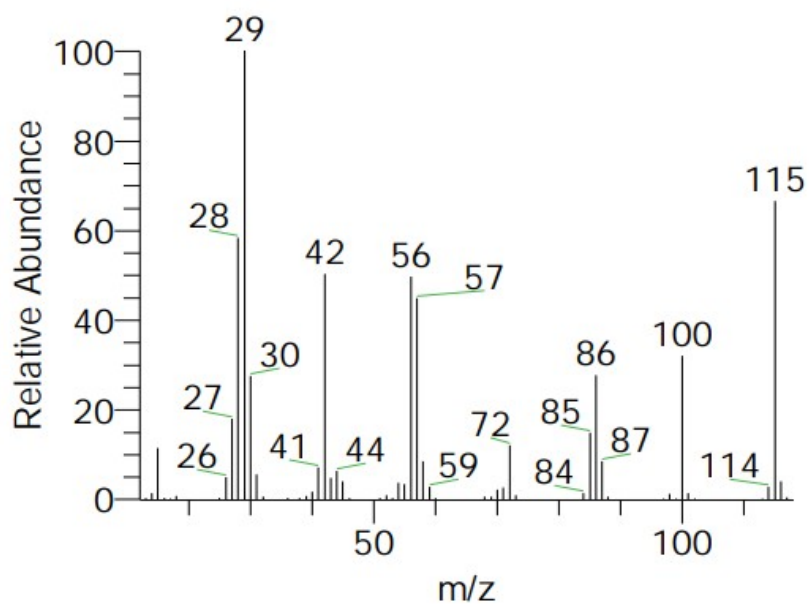

Figure S17. Mass spectrum of N-formyl morpholine.

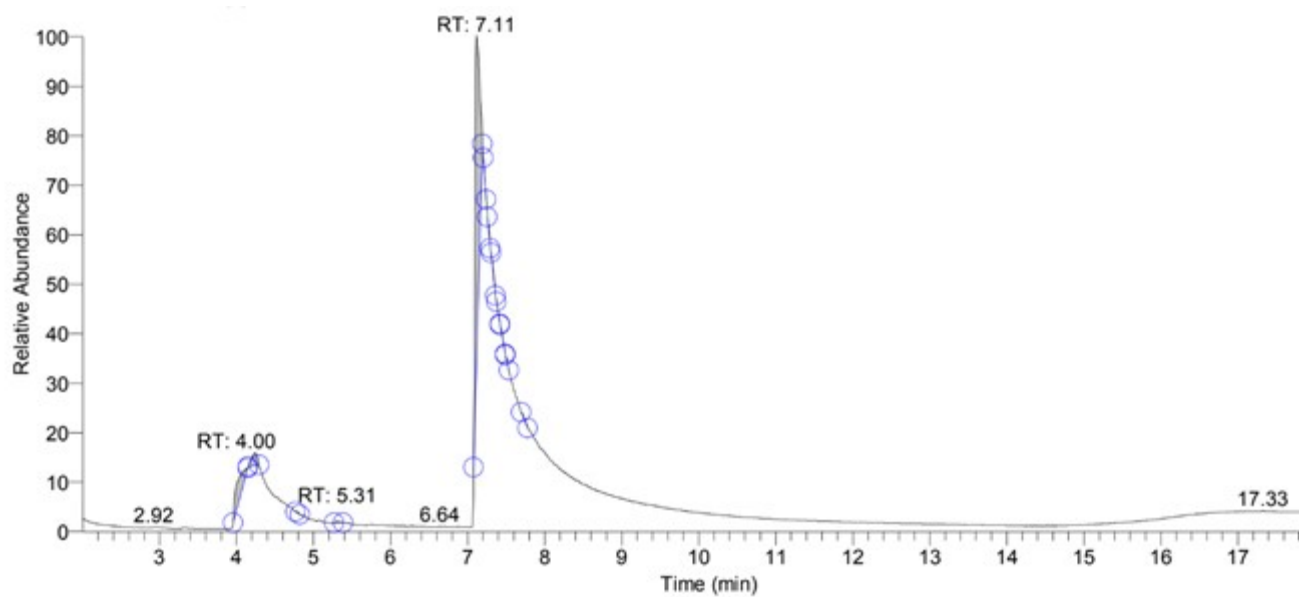

Figure S18. GC spectrum of N-p-tolylformamide.

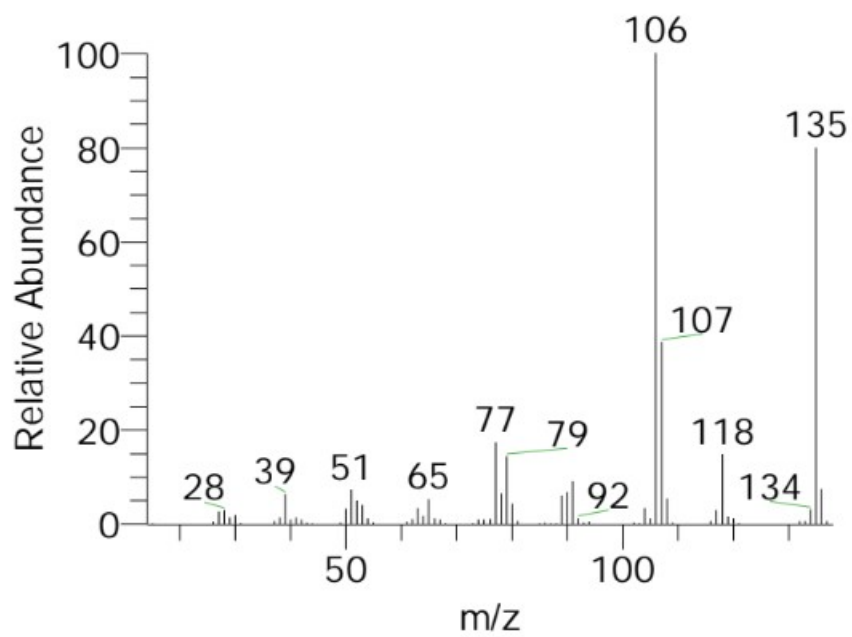

Figure S19. Mass spectra of N-p-tolylformamide.

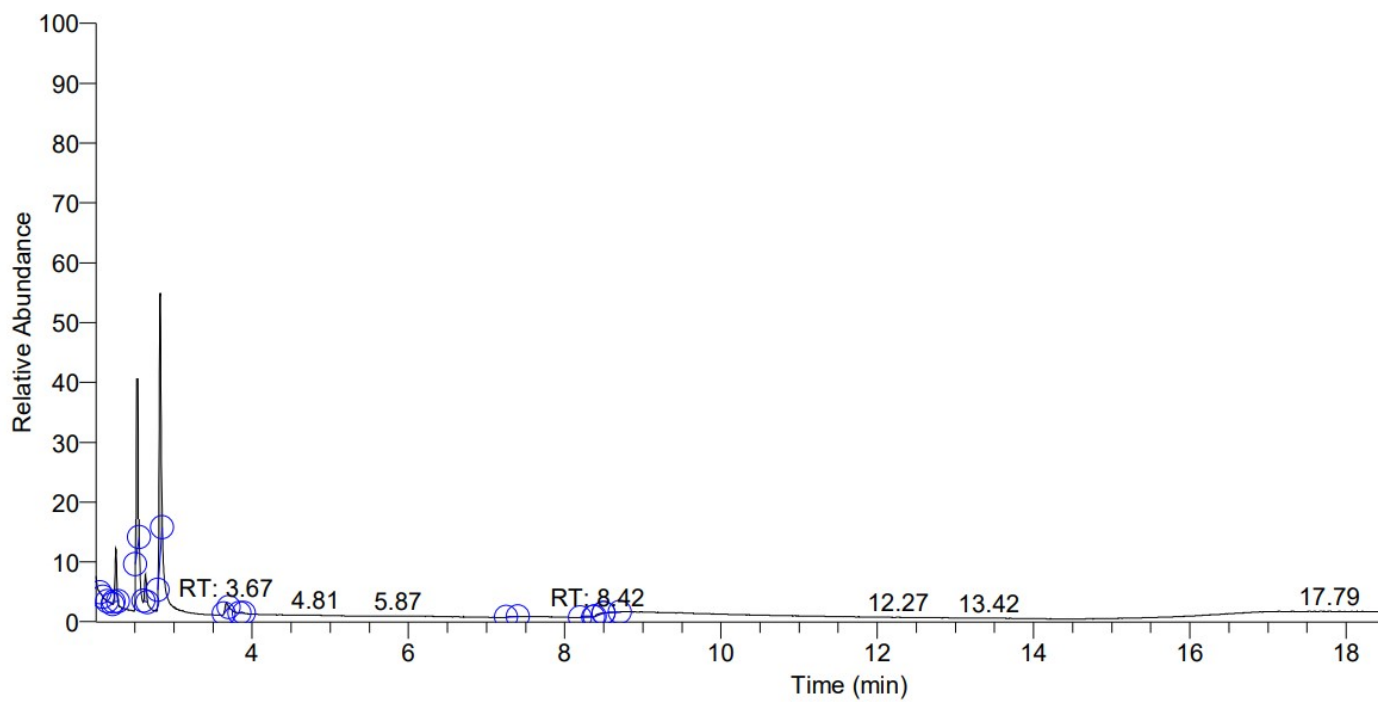

Figure S20. GC spectra of N-methyl-N-phenylformamide

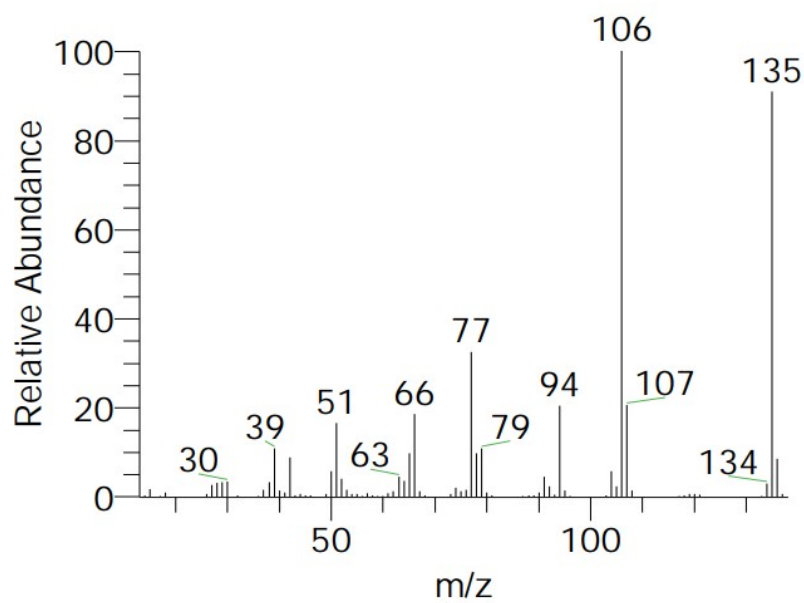

Figure S21. Mass Spectrum of N-methyl-N-phenylformamide

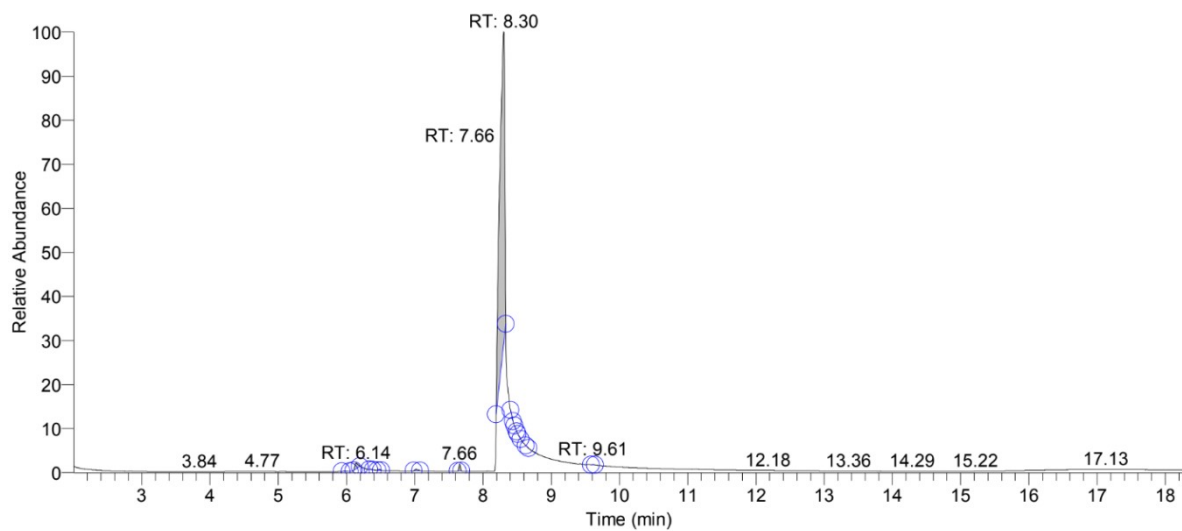

Figure S22. GC spectrum of N-(4-methoxyphenyl)formamide.

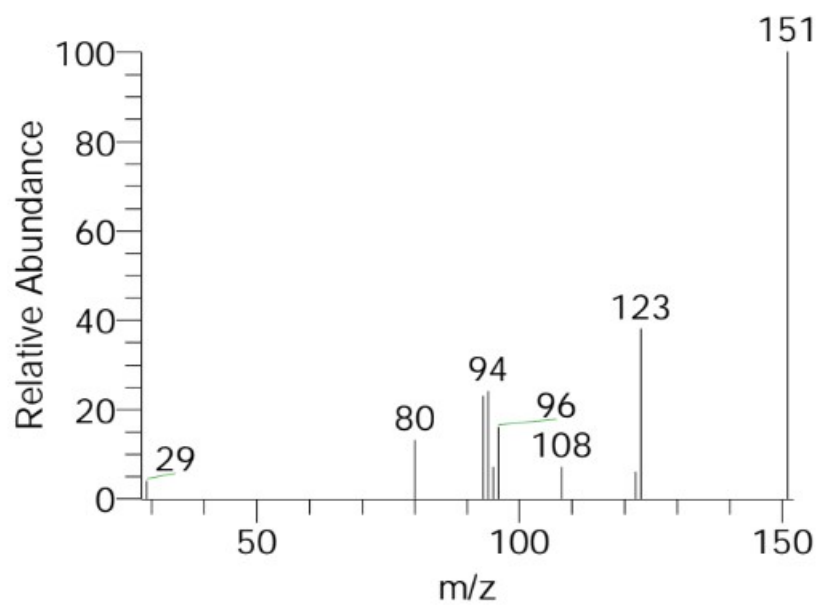

Figure S23. Mass Spectrum of N-(4-methoxyphenyl)formamide.

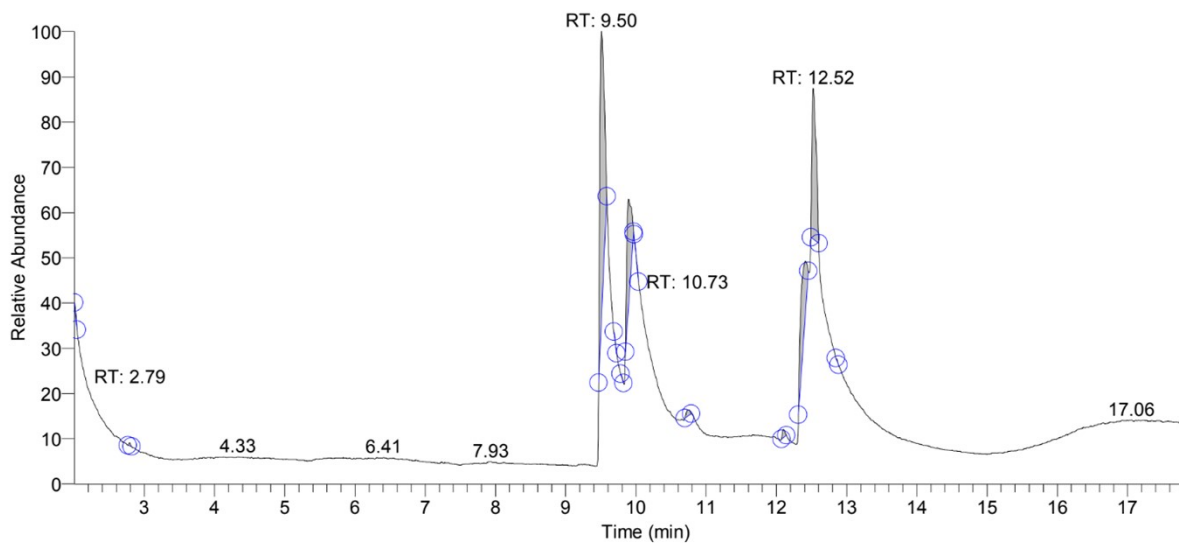

Figure S24. GC spectrum of P-phenoxyformanilide.

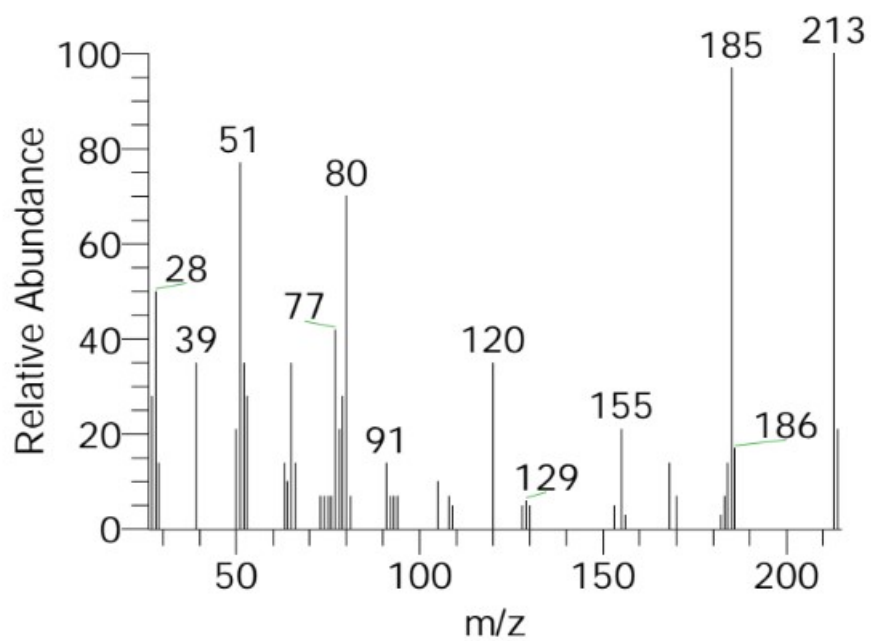

Figure S25. Mass spectrum of P-phenoxyformanilide.



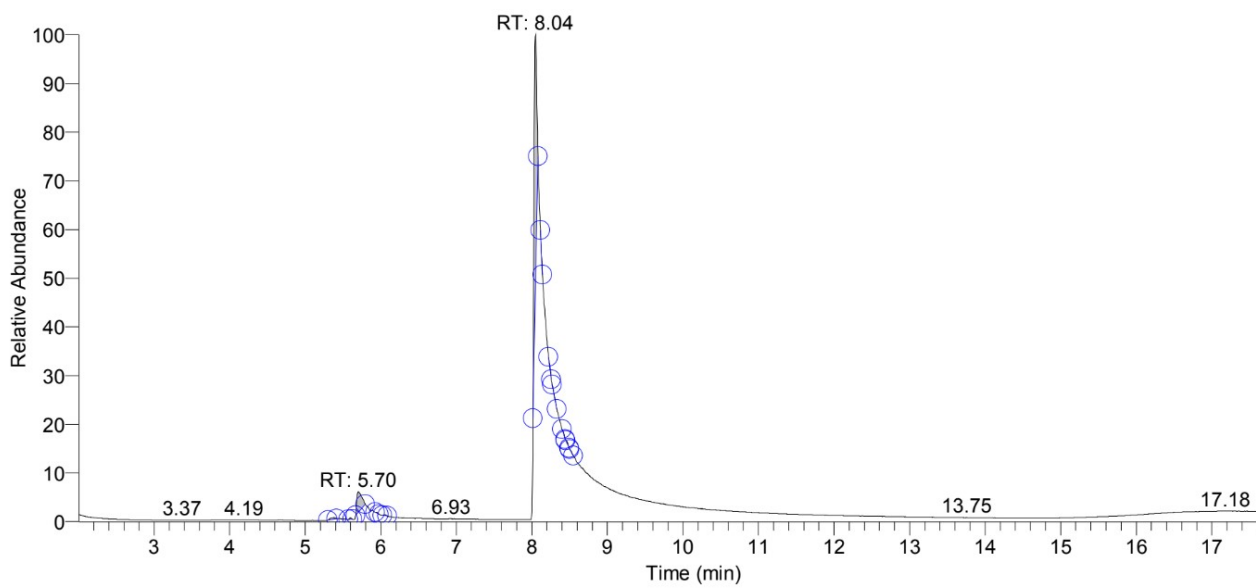

Figure S26. GC spectra of N-(4-chlorophenyl)formamide.

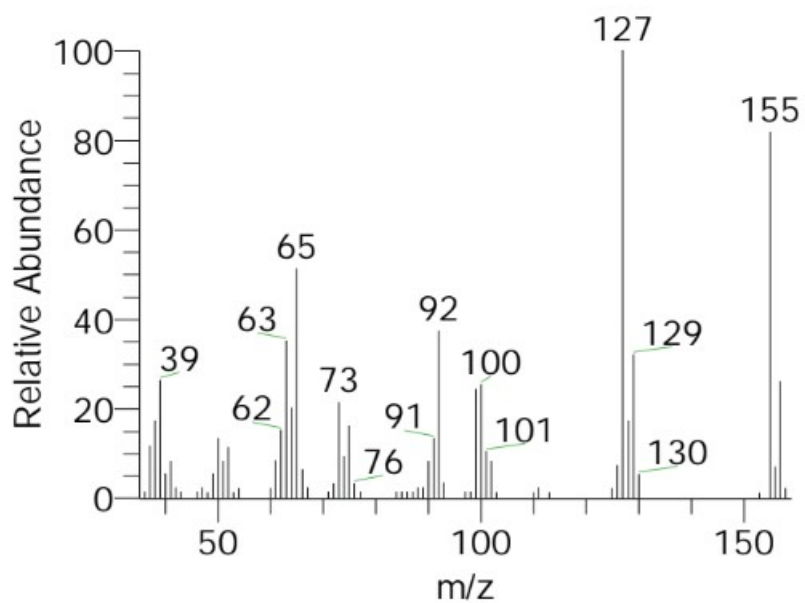

Figure S27. Mass spectra of N-(4-chlorophenyl)formamide.

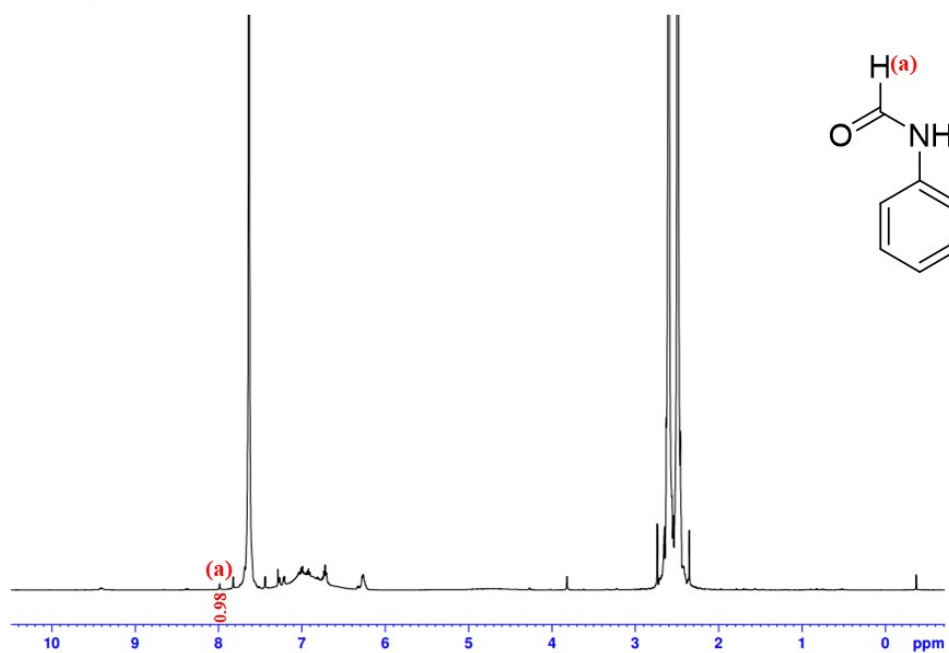

Figure S28.  $^1\text{H}$  NMR spectra of N- phenylformamide

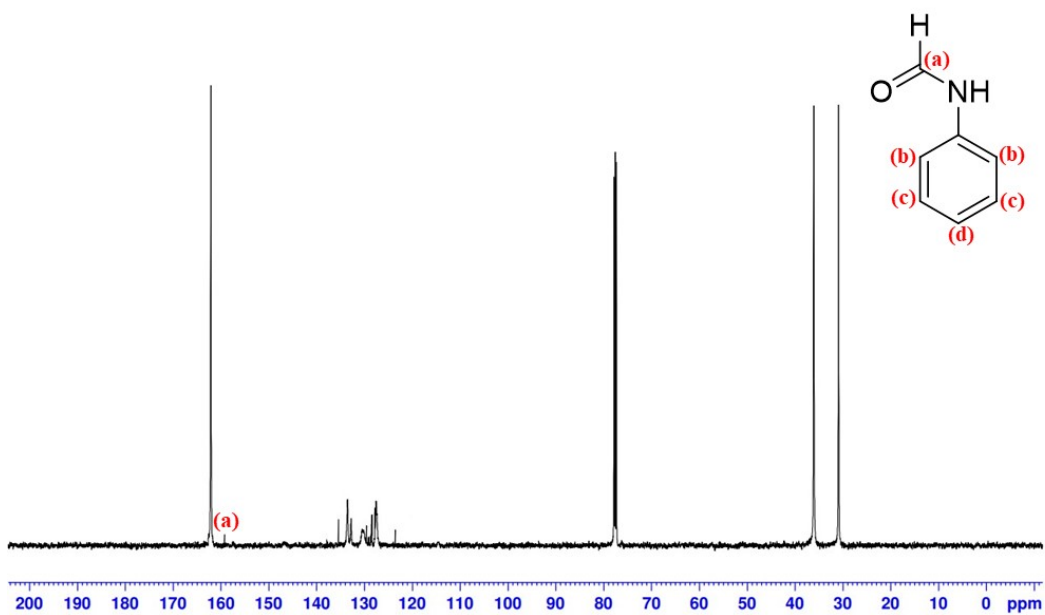

Figure S29.  $^{13}\text{C}$  NMR spectra of N- phenylformamide

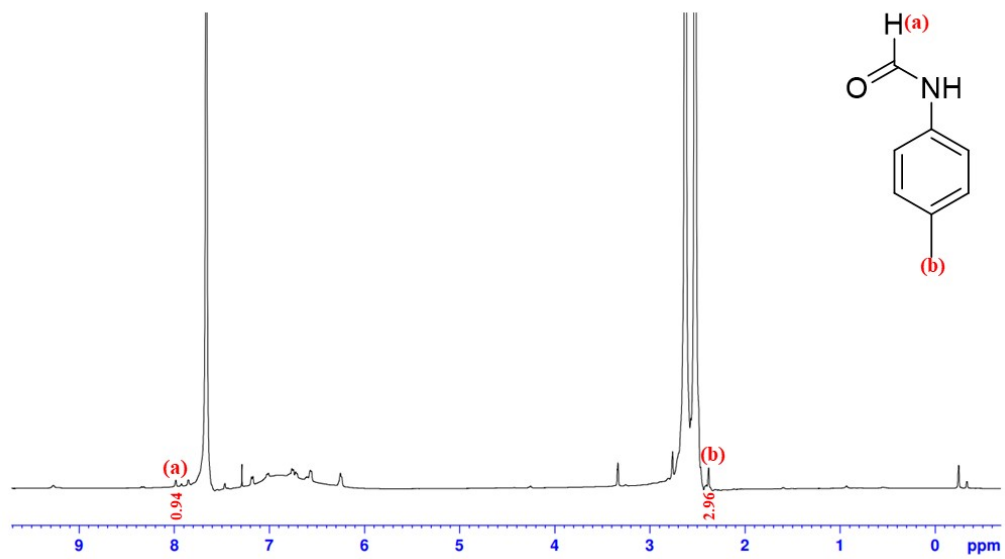

Figure S30. <sup>1</sup>H NMR spectra of N-p-tolylformamide

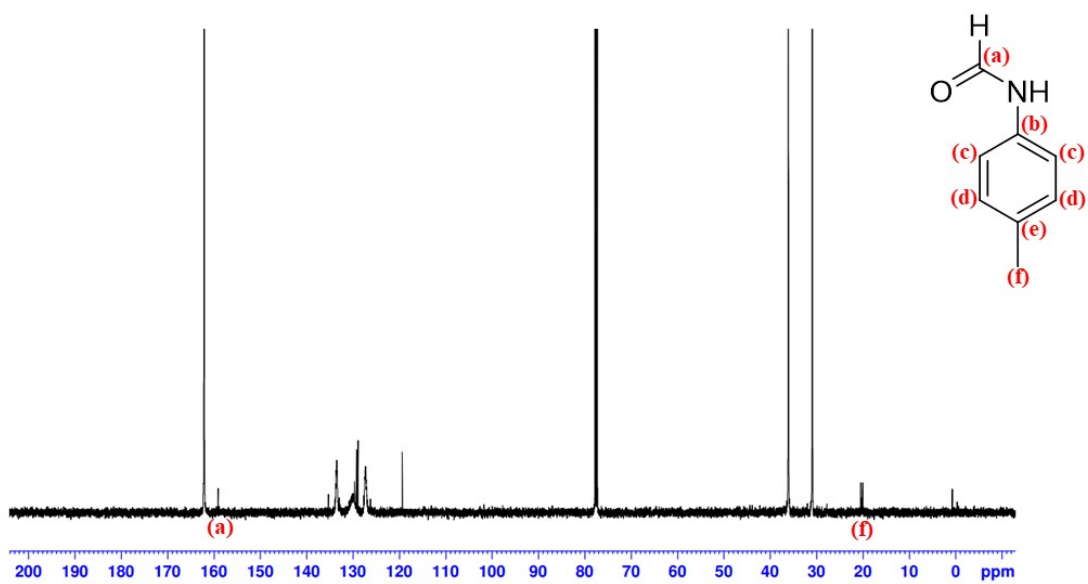

Figure S31. <sup>13</sup>C NMR spectrum of N-p-tolylformamide.

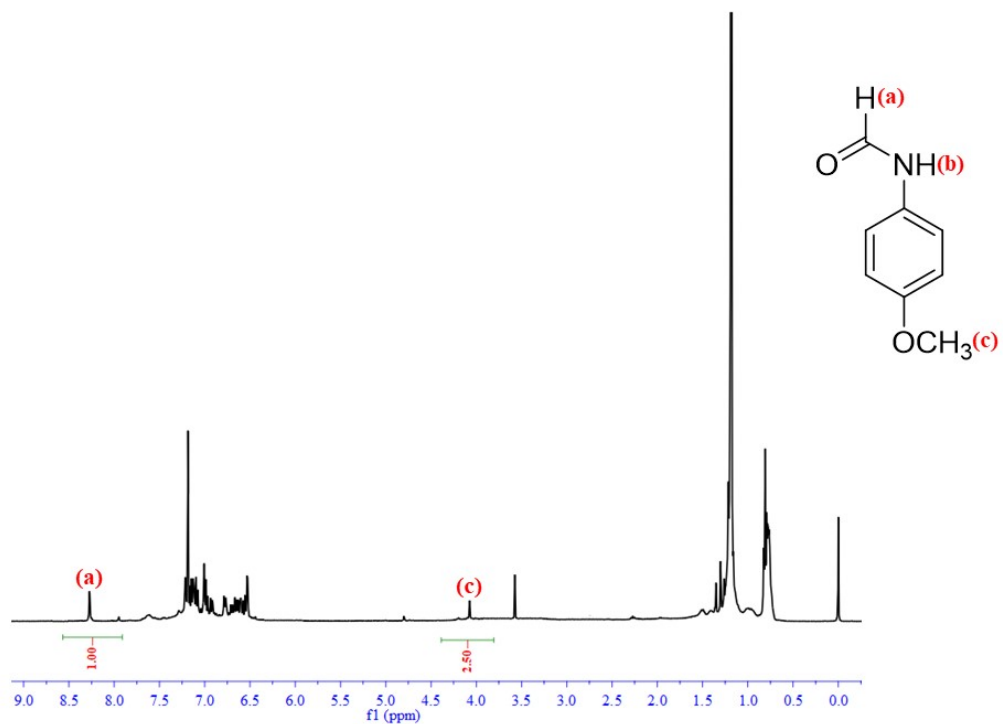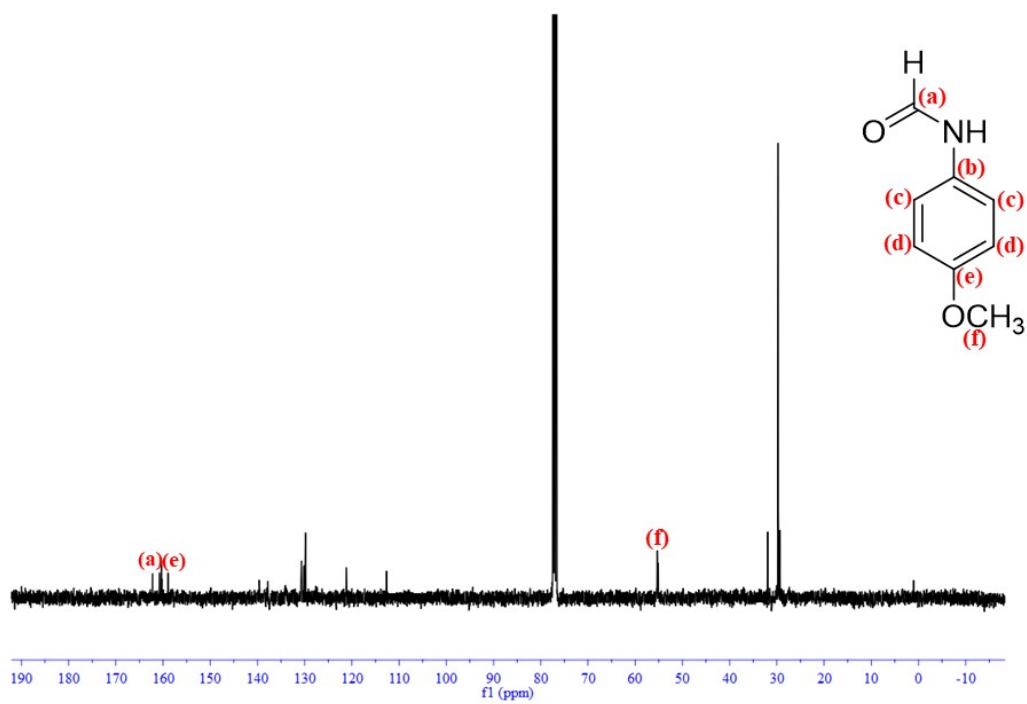

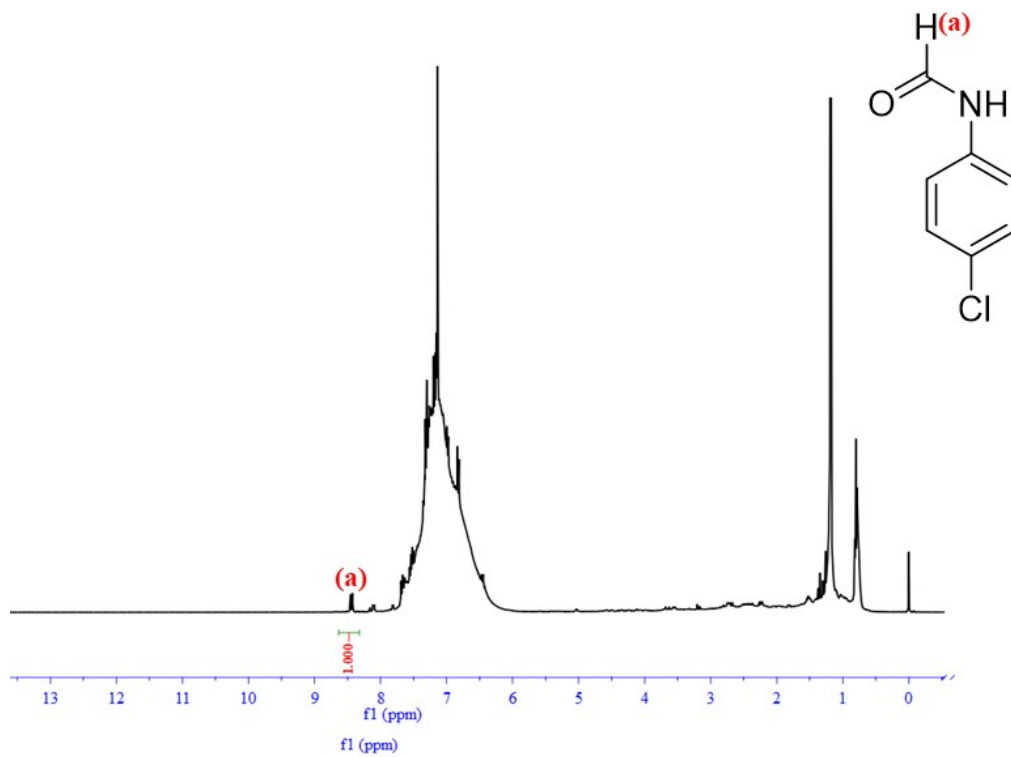

Figure S34.  $^1\text{H}$  NMR spectra of N-(4-chlorophenyl)formamide

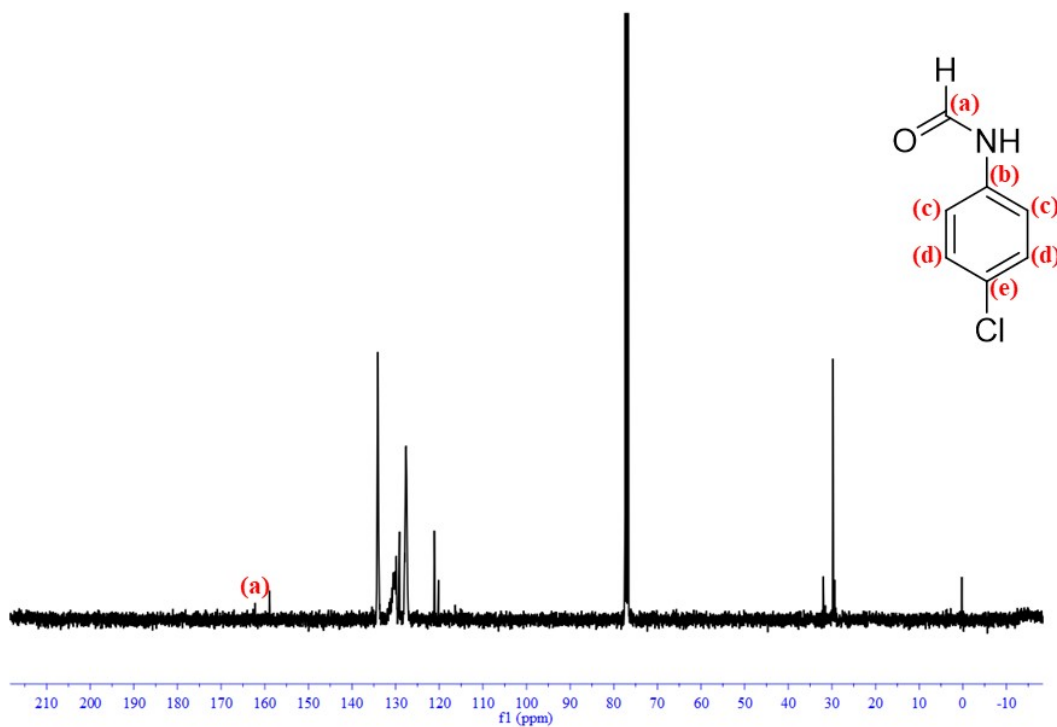

Figure S35.  $^{13}\text{C}$  NMR spectra of N-(4-chlorophenyl)formamide

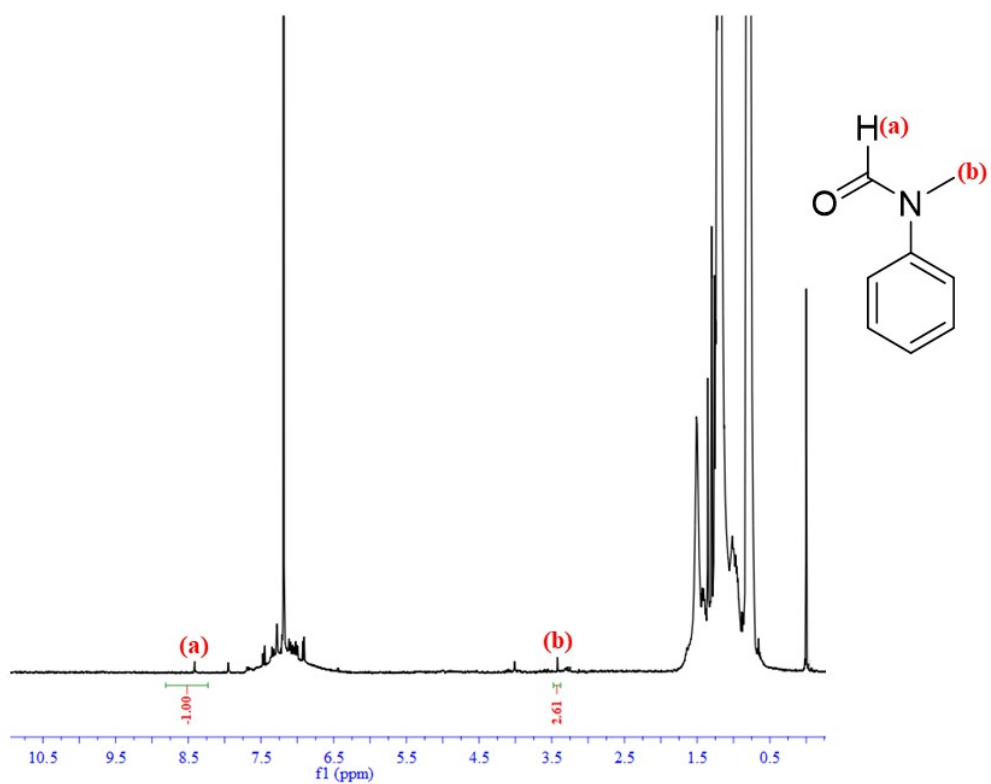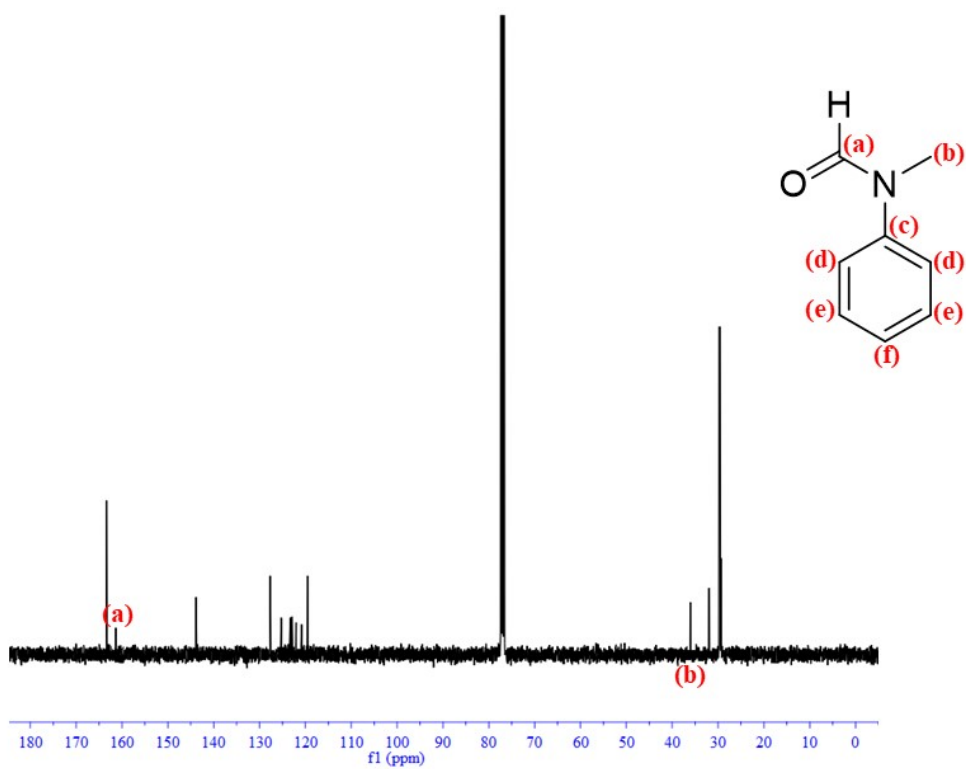

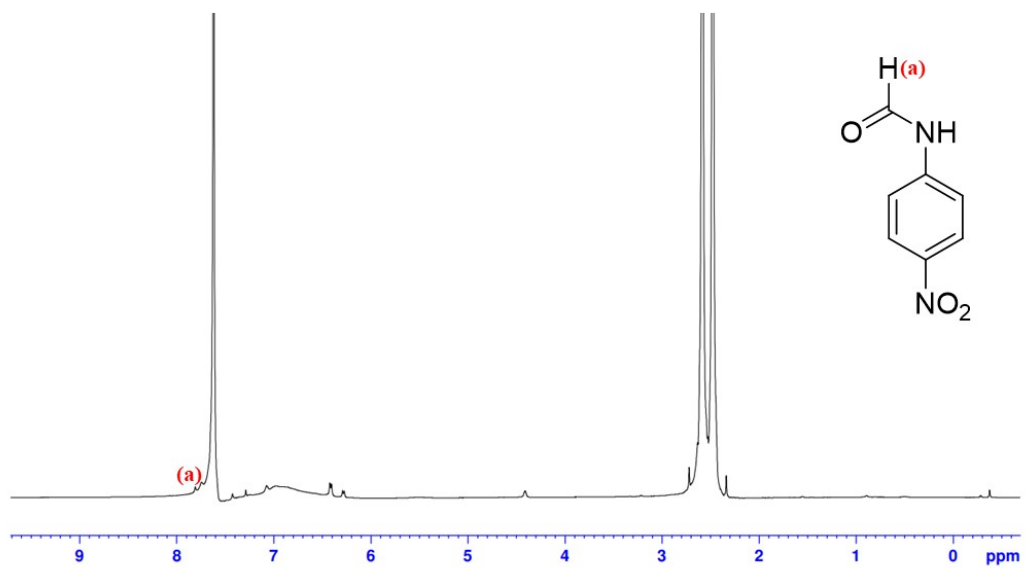

Figure S38.  $^1\text{H}$  NMR spectra of N-(4-nitrophenyl)formamide

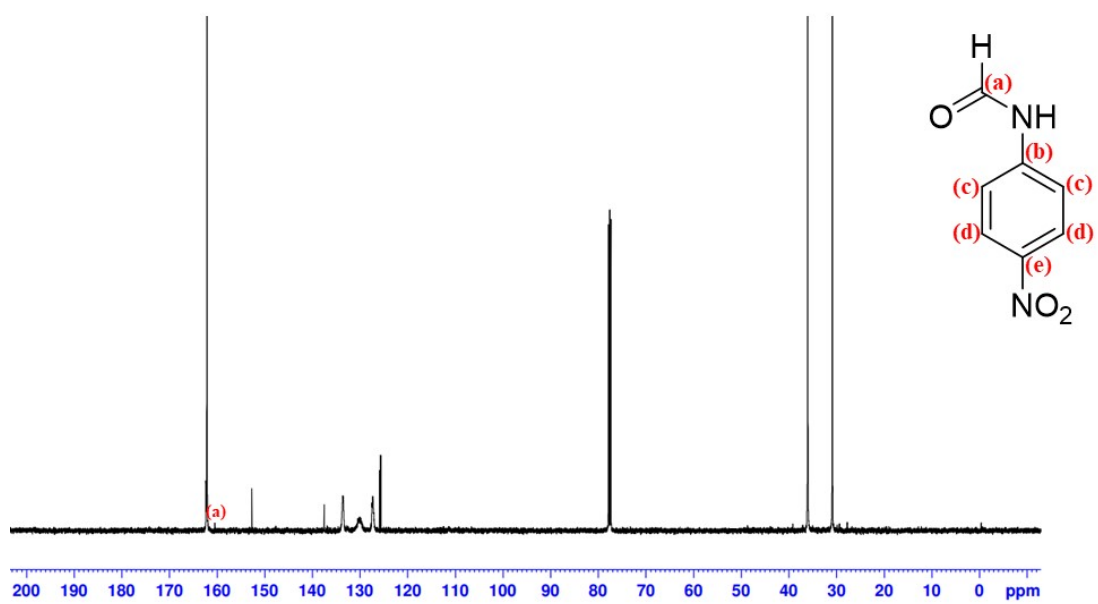

Figure S39.  $^{13}\text{C}$  NMR spectra of N-(4-nitrophenyl)formamide

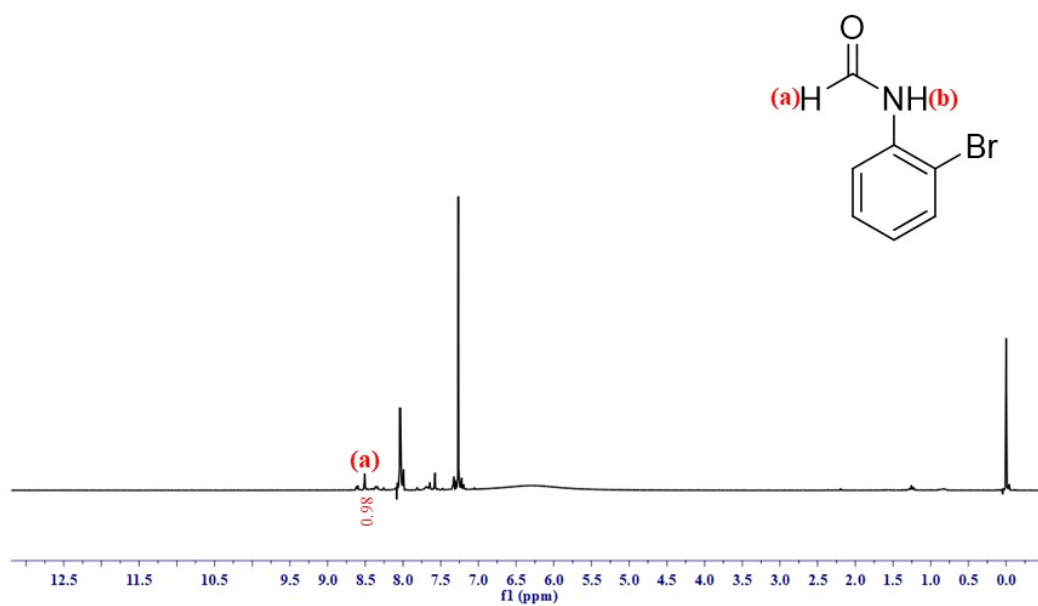

Figure S40.  $^1\text{H}$  NMR spectra of N-(2-bromophenyl)formamide

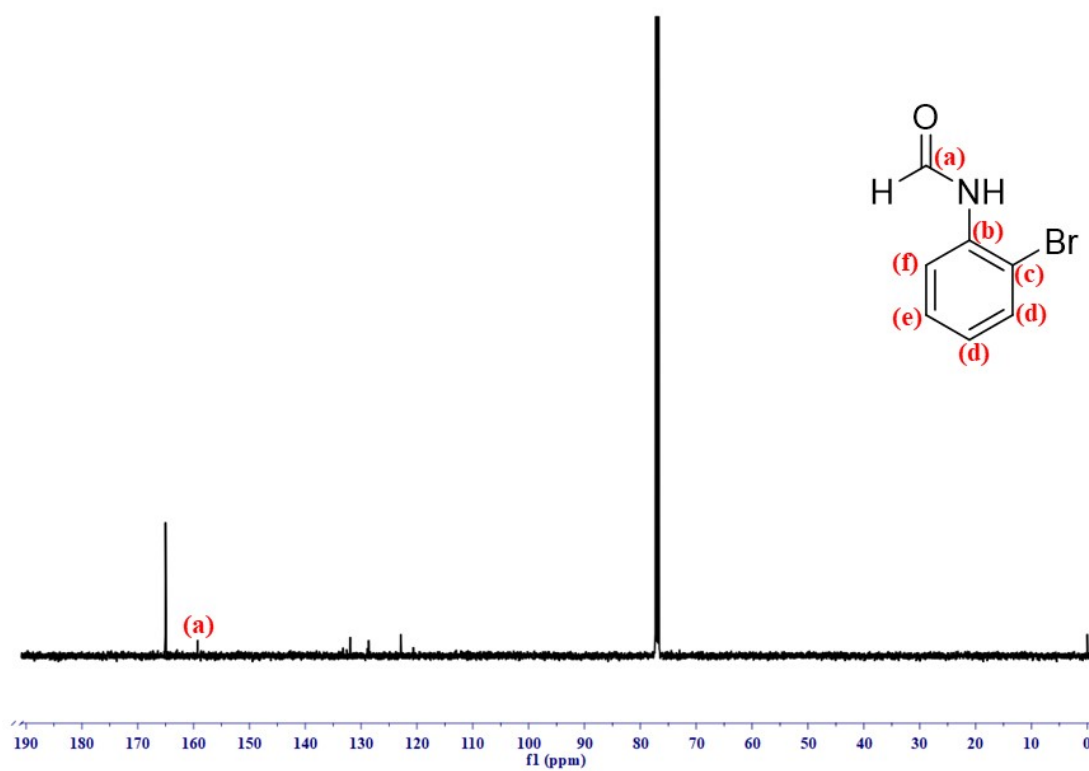

Figure S41.  $^{13}\text{C}$  NMR spectra of N-(2-bromophenyl)formamide
